1 **ISOLATION AND CHARACTERIZATION OF  $\Phi$ GF1, A MORPHOTYPE C3**

2 **BACTERIOPHAGE THAT INFECTS *Escherichia coli***

3

4 Renzo Punil#, Miguel Talledo#, Mayra Arcondo, Katherine Suárez and Katty Zumaeta

5

6 Laboratory of Bacteriophages, Faculty of Biological Sciences, National University of San

7 Marcos, Peru.

8

9 Running head: Morphotype C3 *Escherichia coli* bacteriophage

10

11 # Corresponding authors: [mtalledor@unmsm.edu.pe](mailto:mtalledor@unmsm.edu.pe), [rjpunil@gmail.com](mailto:rjpunil@gmail.com)

12

13

14 **ISOLATION AND CHARACTERIZATION OF  $\Phi$ GF1, A MORPHOTYPE C3**

15 **BACTERIOPHAGE THAT INFECTS *Escherichia coli***

16 Renzo Punil, Miguel Talledo\*, Mayra Arcondo, Katherine Suárez and Katty Zumaeta

17 Laboratory of Bacteriophages, Faculty of Biological Sciences, National University of San  
18 Marcos, Peru.

19 \* Corresponding Author: mtalledor@unmsm.edu.pe

20

21 **ABSTRACT**

22 It has been isolated a lytic bacteriophage specific to *Escherichia coli*, which can infect at least  
23 one different bacterial group. Phage  $\Phi$ GF1 was isolated from a wastewater treatment plant. It  
24 is resistant to the effect of chloroform and is stable at 40 and 50 °C. In addition, it is stable in  
25 the range of pH 5-8. Its host range is wide, infecting even strains from another genus such as  
26 *Shigella*. The one-step growth curve yielded a short latent period of 15 minutes and a burst  
27 size of 85 PFU per infected cell. Under the electron microscope, this phage presents the C3  
28 morphotype, extremely rare among members of the Podoviridae family. Phage  $\Phi$ GF1 shows  
29 some characteristics that could be considered useful in biocontrol applications against *E. coli*.

30 Keywords: Bacteriophage, *Escherichia coli*, morphotype C3, *Podoviridae*.

31

32 **IMPORTANCE**

33 Wastewater throughout the world is a heavy carrier of potential pathogens that live in their  
34 environment along with other biological agents, such as bacteriophages, which play a  
35 controlling role of the bacterial populations there, as in soil. The description of the diversity  
36 of such bacteriophages is of paramount importance since they could be used to intentionally  
37 reduce or remove those pathogens from that environment. Our work describes a  
38 bacteriophage that lives primarily in this type of water.

## 39 INTRODUCTION

40 Bacteriophages are viruses that infect bacteria but no other cellular forms and whose  
41 discovery is attributed both to British microbiologist Frederick W. Twort (1915) and to  
42 French-Canadian bacteriologist Felix d'Herelle in 1917 (X. Wittebole *et al.*, 2014; D.H.  
43 Duckworth, 1976). While the initial interest of the scientific community about bacteriophages  
44 was its use as tools to fight bacterial diseases, over time this idea was left aside and its study  
45 presented new perspectives, becoming the onset of new techniques today considered  
46 elemental in molecular biology, thanks to Schlesinger studies, as well as those of Hershey and  
47 Chase (R. Sharp, 2001). Furthermore, although it is very common for bacteriophages to have  
48 a high specificity for their host, there are some cases in which the host range is broad and  
49 could indicate some utility in biocontrol applications and their ability to model microbial  
50 distribution in natural environments (B. Koskella and S. Meaden, 2013; Ross *et al.*, 2016). In  
51 any case, this specificity depends on the ability of the virus to bind to bacterial receptors (J.  
52 Bertozzi *et al.*, 2016).

53 *Escherichia coli* is a gram-negative rod-shaped bacterium that can cause a wide range of  
54 diseases, mainly in the intestinal tract, although pathogenic strains have also been found that  
55 affect the urinary tract, the bloodstream and the central nervous system (J.B. Kaper *et al.*  
56 2004; M.A. Croxen and B.B. Finlay, 2010).

57 Some strains of *E. coli*, in addition to produce cytotoxins, can also produce other virulent  
58 factors such as intimin and hemolysin (P.K. Fagan *et al.*, 1999); for these reasons *E. coli* is  
59 considered a pathogen capable of causing diarrhea outbreaks, hemolytic uremic syndrome,  
60 hemorrhagic colitis and dysentery, mostly in children (M.A. Croxen *et al.*, 2013) and many of  
61 these diseases are transmitted by food.

62 Foodborne diseases are a threat to public health worldwide, mainly because many of these  
63 bacteria have become more aggressive and resistant to antibiotics (O.A. Odeyemi and N.A.

64 Sani, 2016). *E. coli* is among the most common pathogenic bacteria that are transmitted by  
65 food (T. González and R. Rojas, 2005), in addition generates great economic losses in the  
66 food industry, where antibiotics cannot be used because they generate bacterial resistance and  
67 physical and chemical treatments to inactivate these bacteria affect the organoleptic properties  
68 of food (P. Garcia *et al.*, 2010). It is why non - thermal alternatives are sought for the  
69 elimination or reduction of the bacterial load, without affecting the organoleptic  
70 characteristics of the food (M. Somolinos *et al.*, 2008).

71 The development of the use of bacteriophages for therapy is long term, since it requires many  
72 regulations in the western world and therefore many companies have opted for the application  
73 of these viruses in the field of food safety (T.K. Lu and M.S. Koeris, 2011), as the proteins  
74 derived from these viruses (endolysins) for the biocontrol of pathogenic bacteria in foods,  
75 without altering their organoleptic properties (P. García *et al.*, 2010). Added to this, several  
76 studies have shown that bacteriophages can lyse multidrug-resistant bacteria taking advantage  
77 of the fact that their mechanism of action is different from that of antibiotics (I. Haq *et al.*  
78 2012; C. Verraes *et al.*, 2013; A. Nilsson, 2014).

79 Bacteriophages have already been used for the reduction or elimination of the bacterial load  
80 of different pathogens in different types of food, but not all bacteriophages are efficient  
81 eliminating in the process of bacterial reduction or elimination. Therefore, it is necessary to  
82 know the microbiological, physicochemical and molecular characteristics of the  
83 bacteriophage to be used (G.A. Gonçalves *et al.*, 2015).

84 The usefulness of bacteriophages depends both on their own biological properties and on the  
85 environment where they will be used, so the goal of this study was the determination of the  
86 microbiological and physicochemical properties of the lytic bacteriophage  $\Phi$ GF1 that infects  
87 *Escherichia coli*.

88

## 89 **RESULTS**

### 90 *Isolation and purification of bacteriophage*

91 Bacteriophage  $\Phi$ GF1 was isolated from a positive sample in broth (Figure 1A). Successive  
92 double soft layer agar assays led to the isolation of a pure phage, and through the spot test it  
93 was possible to demonstrate the lytic activity of this phage against *Escherichia coli* ATCC<sup>®</sup>  
94 25922<sup>™</sup> (Figure 1B).

95

### 96 *Sensitivity to chloroform*

97 The viability of phage  $\Phi$ GF1 was not affected after 1 hour of exposure to chloroform  
98 compared to the control test, in both cases a very similar PFU/mL value was observed (Figure  
99 2).

100

### 101 *Thermal stability*

102 Thermal stability of phage  $\Phi$ GF1 is maintained at temperature ranging from 40 to 50 °C for  
103 up to 1 hour, and the phage is completely inactivated after 30 minutes at 70 °C and 5 minutes  
104 at 80 °C, as showed in Figure 3.

105

### 106 *pH stability*

107  $\Phi$ GF1 is stable in the range of pH 5 to 8, while at pH of 9 and 10 its viability decreases up to  
108 54 %. Acid environments of pH 3 and 4, significantly affects the viability of the phage,  
109 causing a 3-log decrease (Figure 4). However, none of the assayed pH variations completely  
110 inactivates  $\Phi$ GF1 after 1 hour of exposure.

111

### 112 *Determination of the lysis spectrum of $\Phi$ GF1*

113 Thirty one strains were evaluated, among them, other enterobacteria and gram-positive  
114 bacteria. Sensitive strains to phage  $\Phi$ GF1 were *E. coli* GF1, GF2 and EC3 (laboratory wild  
115 type strains), along with *Escherichia coli* ATCC<sup>®</sup> 13706<sup>™</sup>, *Escherichia coli* ATCC<sup>®</sup> 25922<sup>™</sup>  
116 and *Shigella sonnei* ATCC<sup>®</sup> 25931<sup>™</sup>.

117

### 118 ***Multiplicity of infection (MOI) and one-step growth curve***

119 Phage  $\Phi$ GF1 showed an optimal MOI of 0.01, a value that was used to carry on the one-step  
120 curve assay. A burst size of 85 PFU/cell was observed with a latent period of 15 minutes  
121 (Figure 5).

122

### 123 ***Transmission electron microscopy***

124 Ultrastructure of phage  $\Phi$ GF1 was studied by TEM. According to this,  $\Phi$ GF1 belongs to the  
125 Podoviridae virus family, characterized by an elongated head and a very short tail (Figure 6).  
126 In addition, morphological similarities with the viral genus *Phi*eco32virus are observed,  
127 including a 125 nm length and a 41 nm width a capsid and a tail with a length of 20 nm and a  
128 width of 11 nm.

129

## 130 **DISCUSSION**

131 Wastewater is a good place to obtain a large number of bacterial strains, namely *Escherichia*  
132 *coli*, as well as non-pathogenic, pathogenic and antibiotic-resistant bacteria with great genetic  
133 diversity (E. Franz *et al.*, 2015) and therefore along with them, a great diversity of specific  
134 bacteriophages.  $\Phi$ GF1 was isolated from the wastewater treatment plant "La Taboada", in  
135 Lima, Peru, showing lytic activity and certain features suitable for future applications.

136  $\Phi$ GF1 is resistant to chloroform, which is an organic compound with solvent capabilities, and  
137 although the sensitivity to chloroform is associated with the presence of lipids in the viral

138 structure, one third of tailed phages that do not have lipids as part of the particle are sensitive  
139 to chloroform (H. W. Ackermann, 2006). In fact, chloroform can act as a destabilizing factor,  
140 and in many trials where chloroform is applied to remove the bacterial fraction after phage  
141 challenging, filtration is the preferred and only treatment (I.H. Basdew and M.D. Laing,  
142 2014).

143  $\Phi$ GF1 is very stable at 40 to 50 °C. This is very common in phages such as PA5oct, which  
144 infects bacteria in an optimum temperature of 37 °C (Z. Drulis-Kawa *et al.*, 2014). Phage has  
145 to be adapted to its host and its environmental conditions. Va1 is a specific bacteriophage to  
146 *Vibrio alginolyticus*: the particle is stable at 20 to 30 °C, because *Vibrio* is a bacterial genus  
147 usually found in marine environments (C. Fernandez *et al.*, 2017). It is pertinent to add that in  
148 certain pathogenic bacteria, such as *Burkholderia thailandensis*, temperature determines the  
149 fate of the phage inside the bacterial cell, carrying out a lytic cycle at 37 °C, but going  
150 through lysogenic cycle at 25 °C (J. Shan *et al.*, 2014).

151 Phage  $\Phi$ GF1 is stable between pH 5 and 8, as reported by N. Jamalludeen *et al.* (2007) and  
152 N.X. Hoa *et al.* (2014) who determined stability of *E. coli* specific phages in a pH range of 5  
153 to 9. Even M.K. Taj *et al.* (2014) have found stable coliphages at pH 4. In a review by E.  
154 Jończyk *et al.* (2011), *E. coli* T7 phages can remain stable in pH ranges of 3 to 11, at very low  
155 temperatures. Very acidic pHs significantly decrease the viral concentration, but do not  
156 entirely eliminate the phage fraction.

157 The latent period of this phage extends to 15 minutes, close to the 19 minutes latent period  
158 reported for phage  $\Omega$ 8 by K. Jann *et al.* (1971), and significantly shorter in comparison to the  
159 25 minute latent phase of phage T4 (A.H. Doermann, 1952). Although the burst size of  $\Phi$ GF1  
160 was 85 plaque-forming units per infective center (PFU/IC), not as high as the 100-150  
161 PFU/IC for T4 (A.H. Doermann, 1952), its shorter latency period and considerably high burst  
162 size make it a good candidate for future applications (M. Middelboe *et al.*, 2010).

163  $\Phi$ GF1 has a wide host range, infecting some wild strains of *E. coli*, *E. coli* ATCC<sup>®</sup> 13706<sup>™</sup>  
164 and *E. coli* ATCC<sup>®</sup> 25922<sup>™</sup>. The particular thing about this phage is that it is not only  
165 infective for strains of the same genus, it is also infective for *Shigella sonnei* ATCC<sup>®</sup>  
166 25931<sup>™</sup>. This coincides with previous reports of common infection of *E. coli* and *Shigella*  
167 such as phage  $\Phi$ 24<sub>B</sub> and phage CA933P (C.E. James *et al.*, 2001; C. Dini, 2011). This is  
168 probably due to the fact that the genus *Shigella* is closely related to enteroinvasive *E. coli*  
169 (EIEC) (R. Lan *et al.*, 2004), as well as the direct relationship between the *E. coli*  
170 bacteriophages and the acquisition of the Shiga toxin that EIEC strains present there (A.D.  
171 O'Brien *et al.*, 1984). Determination of the phage host range is important. P.E<sub>1</sub> phage only  
172 infects some pathogenic strains of *E. coli*, which is why it is ideal for phage therapy (Z. Bibi  
173 *et al.*, 2016). However, when the spectrum is broad, it can affect the intestinal natural flora, if  
174 it is used to this end (J.J. Gill and P. Hyman, 2010). On the contrary, phages with a broad  
175 spectrum, such as  $\Phi$ GF1, have different uses for surface decontamination and for the  
176 treatment of superficial infections (I.T. Kudva *et al.*, 1999, S. O'Flaherty *et al.*, 2009) or else  
177 as food additives for preventing foodborne diseases (D. Jorquera *et al.*, 2016). Currently uses  
178 include biocontrol in wastewater treatment (S.A.A. Jassim *et al.*, 2016).

179 Morphology of  $\Phi$ GF1 was determined by transmission electron microscopy (TEM). It has a  
180 C3 morphotype, characterized by a capsid length that exceeds its width by several times.  
181 Phages with this morphotype are extremely rare among members of the *Podoviridae* family  
182 (Y. Li *et al.*, 2012) and when they are specific for enterobacteria, they are usually related by  
183 serology and DNA homology (F. Grimont and P.A.A. Grimont, 1981).  $\Phi$ GF1 could belong to  
184 the genus *Phi*co32virus that has only 6 bacteriophage species, all infective for *E. coli*. This  
185 will only be confirmed by genome sequencing.

186 In conclusion, bacteriophage  $\Phi$ GF1 has a short latency period, a considerable burst size, and  
187 has a wide host range, characteristics that make it a good candidate for a diversity of



188 biocontrol of applications *E. coli*, besides presenting an uncommon morphology to other  
189 bacteriophages already reported.

190

## 191 **MATERIALS AND METHODS**

### 192 *Bacterial strain*

193 The strain used as a host for the isolation of bacteriophage  $\Phi$ GF1 was a wild type *Escherichia*  
194 *coli*, isolated from "La Taboada" wastewater treatment plant, in Lima, Peru. After checking its  
195 infectivity against *Escherichia coli* ATCC<sup>®</sup> 25922<sup>TM</sup>, the characterization tests were carried  
196 out with this strain, which was maintained in Heart Brain Infusion broth (BHI, Merck<sup>TM</sup>) at  
197 37 °C for 24 hours.

198

### 199 *Phage Isolation, purification and propagation*

200 Phage  $\Phi$ GF1 was isolated from wastewater prior processing at the treatment plant. A 300 mL  
201 sample was filtered through Whatman grade 1 paper. It was then filtered again in a vacuum  
202 pump (Boeco TM R-300 ) using 0.45  $\mu$ m nitrocellulose membranes (Durapore<sup>®</sup>, Merck<sup>TM</sup>).

203 To demonstrate the presence of bacteriophages in the sample and increase their number, a  
204 qualitative method was carried out; modifying what was done by S. George *et al.* (2014).  
205 Briefly, in 10 mL of BHI broth, 1 mL of the filtrate was added along with 100  $\mu$ L of a log  
206 phase *Escherichia coli* ATCC<sup>®</sup> 25922<sup>TM</sup> broth culture. A control assay was made by adding  
207 10 mL of BHI broth, 1 mL of phosphate buffered saline (PBS) and 100  $\mu$ L of the same  
208 bacterial strain. Both tubes were incubated at 37 °C for 8 hours.

209 The mix showing a significant clearance against the control test tube was centrifuged at 8,000  
210 rpm for 8 minutes and the supernatant was filtered through a 0.45  $\mu$ m nitrocellulose  
211 membrane. To evaluate the presence of bacteriophages, a "spot test" was applied by plating  
212 100  $\mu$ L of a *Escherichia coli* ATCC<sup>®</sup> 25922<sup>TM</sup> overnight culture over a lawn of Tryptic Soy

213 Agar (TSA, Merck Millipore™), and then adding 100 µL of the virus filtrate in each of three  
214 thirds of the plate.

215 The positive spot test filtrate was mixed with the host strain using the double agar layer  
216 technique (M.H. Adams, 1959), to produce lysis plaques with similar morphology, according  
217 to N. Jamalludeen et al. (2007). The isolated lysis plaques were transferred to phosphate  
218 buffered saline. This viral suspension was mixed with the bacterial host two more times in the  
219 same manner until the lysis plaques were uniform in shape and diameter, ensuring the purity  
220 of our bacteriophage. This last lysis plaque was cut from the agar layer, resuspended in  
221 phosphate buffered saline, filtered and mixed with a culture of *Escherichia. coli* ATCC®  
222 25922™ in BHI broth and incubated at 37 °C for 8 hours. Finally, this mixed solution was  
223 centrifuged at 4,400  $\times g$  (Thermo Scientific ST8R) for 30 minutes and filtered through  
224 nitrocellulose membranes (0.45 µm). This bacteriophage suspension was stored at -4 °C.

225

### 226 ***Effect of chloroform***

227 To estimate sensitivity to chloroform, C. Chenard *et al.* (2015) methodology was slightly  
228 modified. Briefly, 500 µL of phage suspension ( $2 \times 10^{10}$  PFU·mL<sup>-1</sup>) was mixed with 500 µL  
229 of extra pure chloroform (Merck Millipore™) and kept under 250 rpm·min<sup>-1</sup> for 1 hour. It  
230 was then centrifuged at 4 100  $\times g$  for 5 minutes and the supernatant was transferred to a  
231 microcentrifuge vial; then it was incubated for 6 hours at room temperature to remove any  
232 chloroform residue. As a control, the same procedure was performed with 500 µL of the  
233 phage suspension and 500 µL of saline solution (NaCl 0.9 % w/v). Each assay was performed  
234 in duplicate and the concentration was determined by the agar double layer technique (M.H.  
235 Adams, 1959).

236

### 237 ***Effect of temperature***

238 The thermal stability of the  $\Phi$ GF1 phage was tested at 40, 50, 60, 70 and 80 °C for 0, 5, 15,  
239 30, 45 and 60 minutes using a phage titer of  $2 \times 10^{10}$  PFU·mL<sup>-1</sup> (Z. Drulis-Kawa *et al.*, 2014).  
240 Each experiment was performed in triplicate and the phage titer was determined by the agar  
241 double layer technique.

242

### 243 ***Effect of pH***

244 To determine the stability of the  $\Phi$ GF1 phage against pH variations, pH ranging from 3 to 10  
245 for 1 hour was assayed, slightly modifying what N.X. Hoa *et al.* (2014) proposed. 100  $\mu$ L of  
246 phage suspension ( $1.3 \times 10^8$  PFU·mL<sup>-1</sup>) was added to 900  $\mu$ L of saline solution (NaCl 0.9 %  
247 w/v), set to a specific pH and incubated at 37 °C for 1 hour. As a control test, 100  $\mu$ L of phage  
248 suspension was inoculated in 900  $\mu$ L of saline solution (NaCl 0.9 % w/v) without changing  
249 pH. After incubation, each sample was adjusted to pH 7 (N.X. Hoa *et al.*, 2014). Each test of  
250 pH stability was carried out in triplicate and the phage titer was determined by the double agar  
251 overlay technique (M.H. Adams, 1959).

252

### 253 ***Host range***

254 Bacterial susceptibility to  $\Phi$ GF1 phage was demonstrated by a spot test. 100  $\mu$ L of an  
255 overnight culture of each bacterial strain were tested against 100  $\mu$ L of phage ( $2 \times 10^{10}$   
256 PFU·mL<sup>-1</sup>) on TSA, spotted in three different regions of a plate, following incubation at 37 °C  
257 for 24 hours (C. Dini and P.J. de Urza, 2010).

258

### 259 ***Determination of multiplicity of infection (MOI) and one-step growth curve***

260 The optimal multiplicity of infection (MOI) of the bacteriophage was determined following L.  
261 Li and Z. Zhang (2014), infecting *Escherichia coli* strain ATCC<sup>®</sup> 25922<sup>TM</sup> at 3 different MOI  
262 (0.01, 0.1 and 1) at 37 °C for 4 hours. For the one-step growth curve experiment, 100  $\mu$ L of an

263 overnight culture of *Escherichia coli* ATCC® 25922™ was inoculated to 10 mL of BHI broth  
264 and incubated at 37 °C to reach a 10<sup>8</sup> CFU mL<sup>-1</sup> titer (0.5 McFarland standard). Later 1 mL of  
265 this broth was mixed with 1 mL of ΦGF1 phage suspension, at the optimal MOI previously  
266 determined, following incubation at 37 °C for 10 minutes and then centrifuged at 4 000 x g  
267 for 3 minutes. Pellet was resuspended in 2 mL of BHI broth. 100 µL of this broth were  
268 transferred to 50 mL of BHI broth and incubated at 37 °C (M. Middelboe et al., 2010).  
269 Samples (in duplicate) were taken every 5 minutes for 60 minutes and assayed by the double  
270 agar overlay technique (M.H. Adams, 1959).

271

### 272 *Electron microscopy of ΦGF1*

273 A concentrated phage sample was negatively stained with 2 % (w/v) uranyl acetate (pH 4.0)  
274 on a Formvar-coated copper grid and examined by Transmission Electron Microscopy (JEOL  
275 JEM-1400 Plus) (N. Jamalludeen *et al.*, 2007). Phage size was determined from the average  
276 of three independent measurements.

277

### 278 **ACKNOWLEDGEMENTS**

279 This work was supported by the Programa Nacional de Innovación para la Competitividad y  
280 Productividad (Innovate Perú), under the Contract No. 160-PNICP-PIAP-2015, between this  
281 program and the National University Mayor of San Marcos, Lima, Peru.

282 At the same time, the authors thank Dr. Maurilio José Soares, main researcher from the Carlos  
283 Chagas Institute, Brazil, for his help and advice in the use of the transmission electron  
284 microscope.

285

### 286 **REFERENCES**

- 287 1. Ackermann HW. 2006. Classification of Bacteriophages, p. 746. *In* Calendar, R (ed.),  
288 The Bacteriophages, Vol 2, 2nd ed. Oxford University Press, New York.
- 289 2. Adams MH. 1959. Bacteriophages, 1st ed. Interscience Publishers, Inc., New York.
- 290 3. Basdew IH, Laing MD. 2014. Stress sensitivity assays of bacteriophages associated  
291 with *Staphylococcus aureus*, causal organism of bovine mastitis. *African J Microbiol*  
292 *Res* 8:200–210.
- 293 4. Bertozzi J, Storms Z, Sauvageau D. 2016. Host receptors for bacteriophage adsorption.  
294 *FEMS Microbiol Lett* 363:fnw002.
- 295 5. Bibi Z, Abbas Z, Rehman S ur. 2016. The phage P.E 1 isolated from hospital sewage  
296 reduces the growth of *Escherichia coli*. *Biocontrol Sci Technol* 26:181–188.
- 297 6. Chénard C, Chan AM, Vincent WF, Suttle CA. 2015. Polar freshwater cyanophage S-  
298 EIV1 represents a new widespread evolutionary lineage of phages. *ISME J* 9:2046–  
299 2058.
- 300 7. Croxen MA, Finlay BB. 2010. Molecular mechanisms of *Escherichia coli*  
301 pathogenicity. *Nat Rev Microbiol* 8:26–38.
- 302 8. Croxen MA, Law RJ, Scholz R, Keeney KM, Wlodarska M, Finlay BB. 2013. Recent  
303 advances in understanding enteric pathogenic *Escherichia coli*. *Clin Microbiol Rev*  
304 26:822–880.
- 305 9. Dini C, De Urza PJ. 2010. Isolation and selection of coliphages as potential  
306 biocontrol agents of enterohemorrhagic and Shiga toxin-producing *E. coli*(EHEC and  
307 STEC) in cattle. *J Appl Microbiol* 109:873–887.
- 308 10. Dini C. 2011. Aislamiento y caracterización molecular de bacteriófagos de bacterias  
309 enteropatógenas para biocontrol de enfermedades transmitidas por alimentos (ETA).  
310 Universidad Nacional de La Plata.

- 311 11. Doermann AH. 2004. The intracellular growth of bacteriophages: I. Liberation of  
312 intracellular bacteriophage T4 by premature lysis with another phage or with Cyanide.  
313 J Gen Physiol 35:645–656.
- 314 12. Drulis-Kawa Z, Olszak T, Danis K, Majkowska-Skrobek G, Ackermann HW. 2014. A  
315 giant Pseudomonas phage from Poland. Arch Virol 159:567–572.
- 316 13. Duckworth DH. 1976. “Who discovered bacteriophage?”. Bacteriol Rev 40:793–802.
- 317 14. Fagan PK, Hornitzky MA, Bettelheim KA, Djordjevic SP. 1999. Detection of shiga-  
318 like toxin (stx1 and stx2), intimin (eaeA), and enterohemorrhagic Escherichia coli  
319 (EHEC) hemolysin (EHEC hlyA) genes in animal feces by multiplex PCR. Appl  
320 Environ Microbiol 65:868–872.
- 321 15. Fernández C, Flores V, Medina M. 2017. Aislamiento y caracterización del  
322 bacteriófago Va1 específico a *Vibrio alginolyticus*. Rev Peru Biol 24:93–100.
- 323 16. Franz E, Veenman C, Van Hoek AHAM, Husman ADR, Blaak H. 2015. Pathogenic  
324 *Escherichia coli* producing Extended-Spectrum  $\beta$ -Lactamases isolated from surface  
325 water and wastewater. Sci Rep 14372.
- 326 17. García P, Rodríguez L, Rodríguez A, Martínez B. 2010. Food biopreservation:  
327 Promising strategies using bacteriocins, bacteriophages and endolysins. Trends Food  
328 Sci Technol 21:373–382.
- 329 18. George S, Menon KV, Latha C, Sunil B, Sethulekshmi C, Jolly D. 2014. Isolation of  
330 *Listeria*- specific bacteriophage from three different towns in Kerala, India. Int J Curr  
331 Microbiol Appl Sci 3:667–669.
- 332 19. Gill JJ, Hyman P. 2010. Phage choice, isolation, and preparation for phage therapy.  
333 Curr Pharm Biotechnol 11:2–14.

- 334 20. Gonçalves G, Suehiro B, Costa L, Pantoja J, Andreatti F. 2015. Criteria for selection of  
335 lytic bacteriophage for use in medical field (setting): preliminary data. *Veterinária e*  
336 *Zootec* 22:72–82.
- 337 21. González Flores T, Rojas Herrera RA. 2005. Enfermedades transmitidas por alimentos  
338 y PCR: Prevención y diagnóstico. *Salud Publica Mex* 47:388–390.
- 339 22. Grimont F, Grimont PAD. 1981. DNA relatedness among bacteriophages of the  
340 morphological group C3. *Curr Microbiol* 6:65–69.
- 341 23. Haq I, Chaudhry WN, Akhtar MN, Andleeb S, Qadri I. 2012. Bacteriophages and their  
342 implications on future biotechnology: A review. *Virol J* 9.
- 343 24. Harper DR. 2018. Criteria for Selecting Suitable Infectious Diseases for Phage  
344 Therapy. *Viruses* 10:177.
- 345 25. Hoa NX, Tang F, Bai Q, Zhang W, Lu C. 2007. Isolation and characterization of two  
346 T4-like bacteriophages against pathogenic *Escherichia coli* of piglet. *African J*  
347 *Microbiol Res* 8:3604–3611.
- 348 26. Jamalludeen N, Johnson RP, Friendship R, Kropinski AM, Lingohr EJ, Gyles CL.  
349 2007. Isolation and characterization of nine bacteriophages that lyse O149  
350 enterotoxigenic *Escherichia coli*. *Vet Microbiol* 124:47–57.
- 351 27. James CE, Stanley KN, Allison HE, Flint HJ, Stewart CS, Sharp RJ, Saunders JR,  
352 McCarthy AJ. 2001. Lytic and Lysogenic Infection of Diverse *Escherichia coli* and  
353 *Shigella* Strains with a Verocytotoxigenic Bacteriophage. *Appl Environ Microbiol*  
354 67:4335–4337.
- 355 28. Jann K, Schmidt G, Wallenfels B, Oulbert EF-M. 2009. Isolation and Characterization  
356 of *Escherichia coli* bacteriophage 8 specific for *E. coli* strains belonging to sero-group  
357 O 8. *J Gen Microbiol* 67:289–297.

- 358 29. Jassim SAA, Limoges RG, El-Cheikh H. 2016. Bacteriophage biocontrol in wastewater  
359 treatment. *World J Microbiol Biotechnol* 32:70.
- 360 30. Jończyk E, Kłak M, Miedzybrodzki R, Górski A. 2011. The influence of external  
361 factors on bacteriophages-review. *Folia Microbiol (Praha)* 56:191–200.
- 362 31. Jorquera D, Galarce N, Borie C. 2016. El desafío de controlar las enfermedades  
363 transmitidas por alimentos: bacteriófagos como una nueva herramienta biotecnológica.  
364 *Rev Chil infectología* 32:678–688.
- 365 32. Kaper J, Nataro J, Mobley H. 2004. Pathogenic *Escherichia coli*. *Nat Rev Microbiol*  
366 2:123–140.
- 367 33. Koskella B, Meaden S. 2013. Understanding bacteriophage specificity in natural  
368 microbial communities. *Viruses* 5:806–823.
- 369 34. Kudva IT, Jelacic S, Tarr PI, Youderian P, Hovde CJ. 1999. Biocontrol of *Escherichia*  
370 *coli* O157 with O157-specific bacteriophages. *Appl Environ Microbiol* 65:3767–3773.
- 371 35. Lan R, Alles MC, Donohoe K, Martinez MB, Reeves PR. 2004. Molecular  
372 evolutionary relationships of enteroinvasive *Escherichia coli* and *Shigella* spp. *Infect*  
373 *Immun* 72:5080–5088.
- 374 36. Li L, Zhang Z. 2014. Isolation and characterization of a virulent bacteriophage SPW  
375 specific for *Staphylococcus aureus* isolated from bovine mastitis of lactating dairy  
376 cattle. *Mol Biol Rep* 41:5829–5838.
- 377 37. Li Y, Chen M, Tang F, Yao H, Lu C, Zhang W. 2012. Complete Genome Sequence of  
378 the Novel Lytic Avian Pathogenic Coliphage NJ01. *J Virol* 86:13874–13875.
- 379 38. Lu TK, Koeris MS. 2011. The next generation of bacteriophage therapy. *Curr Opin*  
380 *Microbiol* 14:524–531.



- 381 39. Middelboe M, Chan AM, Bertelsen SK. 2010. Isolation and life cycle characterization  
382 of lytic viruses infecting heterotrophic bacteria and cyanobacteria, p. 118–133. *In*  
383 Suttle, CA Wilhelm, S, Weinbauer, M (eds.), *Manual of Aquatic Viral Ecology*.
- 384 40. Nilsson AS. 2014. Phage therapy-constraints and possibilities. *Ups J Med Sci* 119:192–  
385 198.
- 386 41. O’Brien AD, Newland JW, Miller SF, Holmes RK, Smith HW, Formal SB. 1984.  
387 Shiga-like toxin-converting phages from *Escherichia coli* strains that cause  
388 hemorrhagic colitis or infantile diarrhea. *Science* (80- ) 226:694–697.
- 389 42. O’Flaherty S, Ross RP, Coffey A. 2009. Bacteriophage and their lysins for elimination  
390 of infectious bacteria: Review article. *FEMS Microbiol Rev* 33:801–819.
- 391 43. Odeyemi OA, Sani NA. 2016. Antibiotic resistance and burden of foodborne diseases  
392 in developing countries. *Futur Sci OA* 2:FSO139.
- 393 44. Ross A, Ward S, Hyman P. 2016. More is better: Selecting for broad host range  
394 bacteriophages. *Front Microbiol* 7:1352.
- 395 45. Shan J, Korbsrisate S, Withatanung P, Adler NL, Clokie MRJ, Galyov EE. 2014.  
396 Temperature dependent bacteriophages of a tropical bacterial pathogen. *Front*  
397 *Microbiol* 5:599.
- 398 46. Sharp R. 2001. Bacteriophages: biology and history. *J Chem Technol Biotechnol*  
399 76:667–672.
- 400 47. Somolinos M, García D, Pagán R, Mackey B. 2008. Relationship between sublethal  
401 injury and microbial inactivation by the combination of high hydrostatic pressure and  
402 citral or tert-butyl hydroquinone. *Appl Environ Microbiol* 74:7570–7577.
- 403 48. Taj MK, Ling JX, Bing LL, Qi Z, Taj I, Hassani TM, Samreen Z, Yunlin W. 2014.  
404 Effect of dilution, temperature and pH on the lysis activity of t4 phage against *E.coli*  
405 BL21. *J Anim Plant Sci* 24:1252–1255.

- 406 49. Verraes C, Van Boxtael S, Van Meervenne E, Van Coillie E, Butaye P, Catry B, de  
407 Schaetzen MA, Van Huffel X, Imberechts H, Dierick K, Daube G, Saegerman C, De  
408 Block J, Dewulf J, Herman L. 2013. Antimicrobial resistance in the food chain: A  
409 review. *Int J Environ Res Public Health* 10:2643–2669.
- 410 50. Wittebole X, De Roock S, Opal SM. 2014. A historical overview of bacteriophage  
411 therapy as an alternative to antibiotics for the treatment of bacterial pathogens.  
412 *Virulence* 5:226–235.

413

#### 414 **TABLE LEGEND**

415

416 Table 1. Bacterial strain susceptibility against  $\Phi$ GF1.

417

#### 418 **FIGURE LEGENDS**

419

420 Figure 1. (A) Broth clearance after 8 hours incubation suggests the presence of  
421 bacteriophages. (B) Positive "spot test" of  $\Phi$ GF1 against *Escherichia coli* ATCC® 25922™,  
422 where three lysis spots are observed.

423

424 Figure 2. The effect of chloroform on  $\Phi$ GF1 stability after 60 minutes of exposure.

425

426 Figure 3. Effect of temperature on bacteriophage stability checked at 40 °C, 50 °C, 60 °C, 70  
427 °C and 80 °C after 5, 15 30, 45 and 60 minutes.

428

429 Figure 4. Effect of pH on bacteriophage stability.  $\Phi$ GF1 lysate was treated at different pH  
430 values (3, 4, 5, 6, 7, 8, 9 and 10) for one hour at 37 °C and followed by calculating phage titer  
431 by the double agar overlay technique.

432

433 Figure 5. One-step growth curve of phage  $\Phi$ GF1. The graph shows the plaque-forming units  
434 at different times (in minutes). The length of the latent period is 15 minutes and the burst size  
435 was estimated to be 85 PFU per each infected cell.

436

437 Figure 6. TEM image of  $\Phi$ GF1. Morphology corresponds to the C3 morphotype from the  
438 viral family Podoviridae (order Caudovirales), with a rare elongated head connected to a short  
439 contractile tail by a short neck. Scale bar represents 100 nm.

440

441

442

443 **TABLE**

| Species            | Strain    | $\Phi$ GF1 |
|--------------------|-----------|------------|
| <i>E. coli</i> GF1 | Wild type | +          |
| <i>E. coli</i> GF2 | Wild type | +          |

|                                                                          |              |   |
|--------------------------------------------------------------------------|--------------|---|
| <i>E. coli</i> AR                                                        | Wild type    | - |
| <i>E. coli</i> EC1                                                       | Wild type    | - |
| <i>E. coli</i> EC2                                                       | Wild type    | - |
| <i>E. coli</i> EC3                                                       | Wild type    | + |
| <i>E. coli</i> EC5                                                       | Wild type    | - |
| <i>E. coli</i> EC6                                                       | Wild type    | - |
| <i>E. coli</i> EC7                                                       | Wild type    | - |
| <i>E. coli</i> EC8                                                       | Wild type    | - |
| <i>Escherichia coli</i>                                                  | ATCC® 13706™ | + |
| <i>Escherichia coli</i>                                                  | ATCC® 25922™ | + |
| <i>Shigella sonnei</i>                                                   | ATCC® 25931™ | + |
| <i>Shigella flexneri</i>                                                 | ATCC® 12022™ | - |
| <i>Salmonella</i> Typhimurium                                            | ATCC® 14028™ | - |
| <i>Salmonella enterica subsp. enterica</i><br><i>serovar Abortusequi</i> | ATCC® 9842™  | - |
| <i>Salmonella enterica subsp. enterica</i><br><i>serovar Enteritidis</i> | ATCC® 13076™ | - |
| <i>Proteus vulgaris</i>                                                  | ATCC® 6380™  | - |
| <i>Proteus mirabilis</i>                                                 | ATCC® 12453™ | - |

|                                   |              |   |
|-----------------------------------|--------------|---|
| <i>Enterobacter aerogenes</i>     | ATCC® 13048™ | - |
| <i>Pseudomonas aeruginosa</i>     | ATCC® 15442™ | - |
| <i>Vibrio cholerae</i>            | Wild type    | - |
| <i>Vibrio parahaemolyticus</i>    | ATCC® 17802™ | - |
| <i>Enterococcus faecalis</i>      | ATCC® 29212™ | - |
| <i>Streptococcus agalactiae</i>   | ATCC® 12386™ | - |
| <i>Staphylococcus epidermidis</i> | ATCC® 12228™ | - |
| <i>Bacillus cereus</i>            | ATCC® 14579™ | - |
| <i>Listeria monocytogenes</i>     | ATCC® 19114™ | - |
| <i>Listeria monocytogenes</i>     | ATCC® 19115™ | - |
| <i>Listeria ivanovii</i>          | ATCC® 19119™ | - |
| <i>Listeria innocua</i>           | ATCC® 33090™ | - |

---

444 + = susceptible strain

445 - = non-susceptible strain

446

447 **FIGURES**

448

449 **FIGURE1**

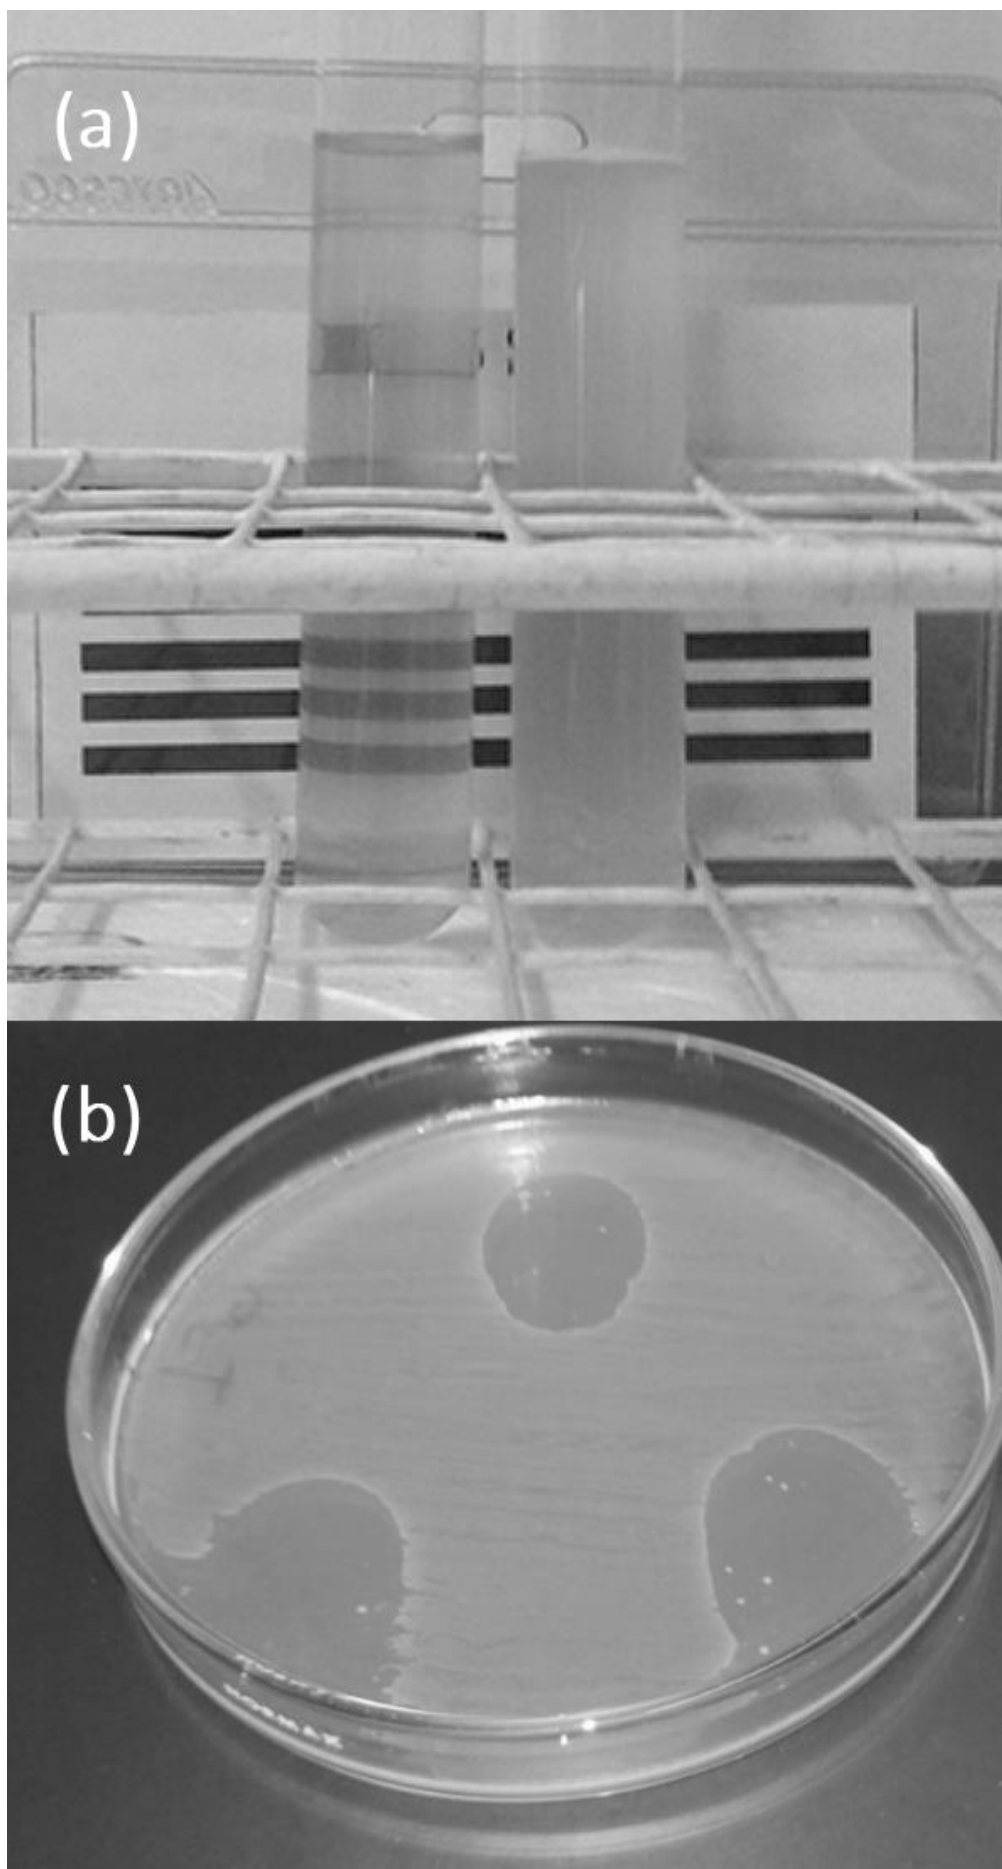

451 **FIGURE 2**

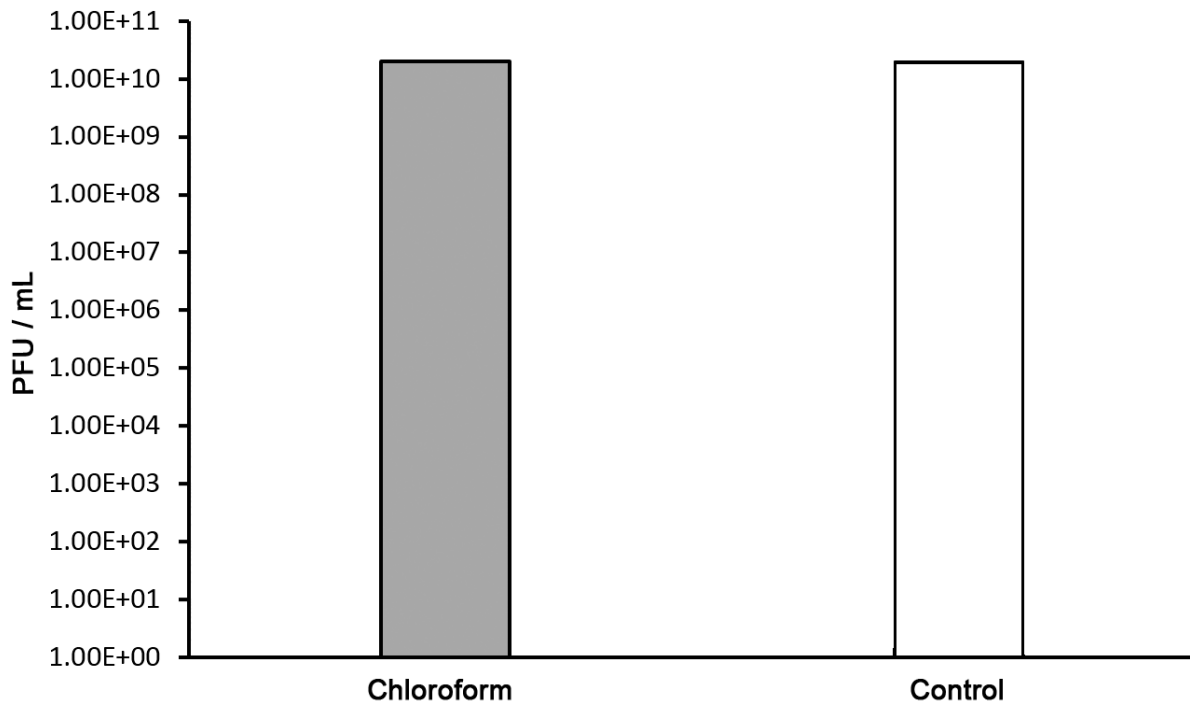

452

453

454 **FIGURE 3**

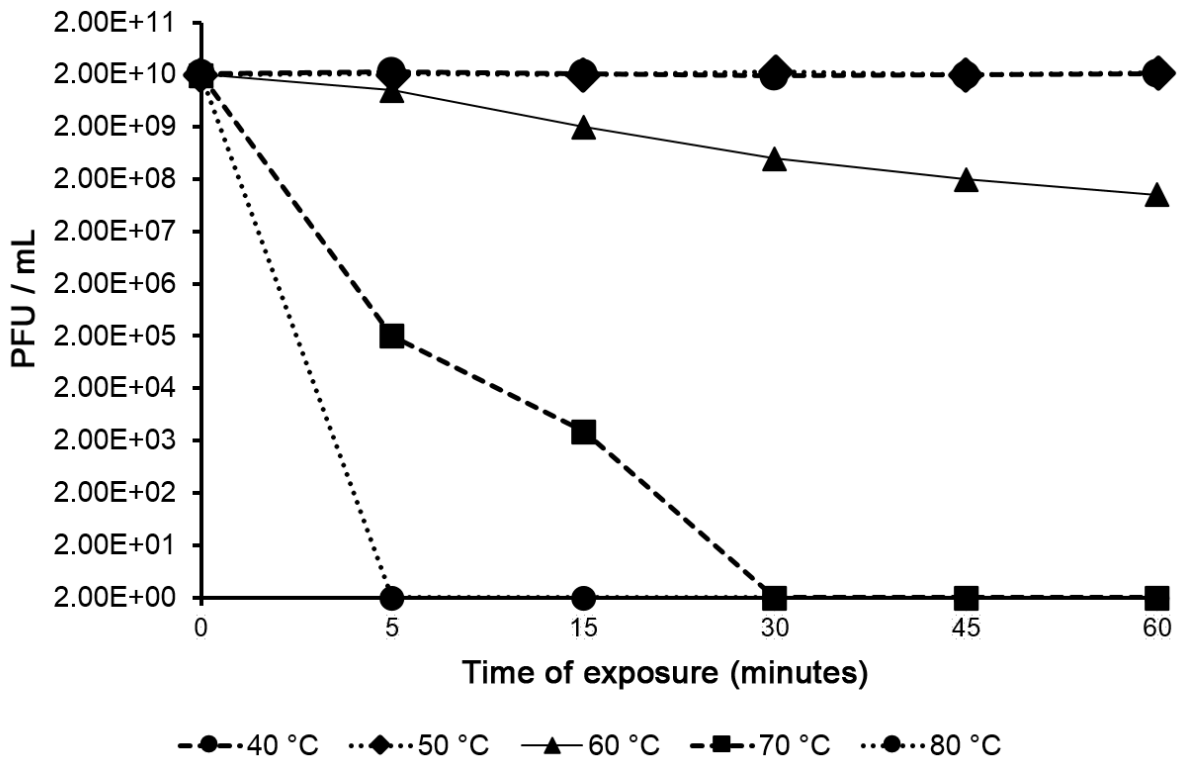

455

456

457 **FIGURE 4**

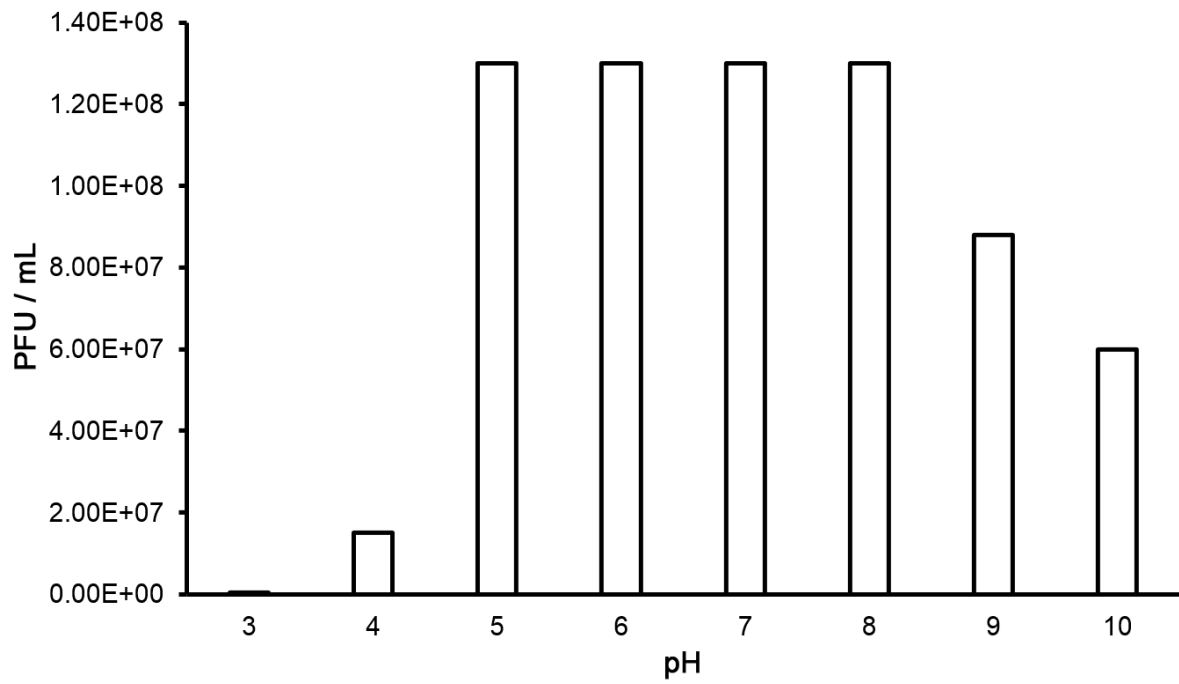

458

459

460 **FIGURE 5**

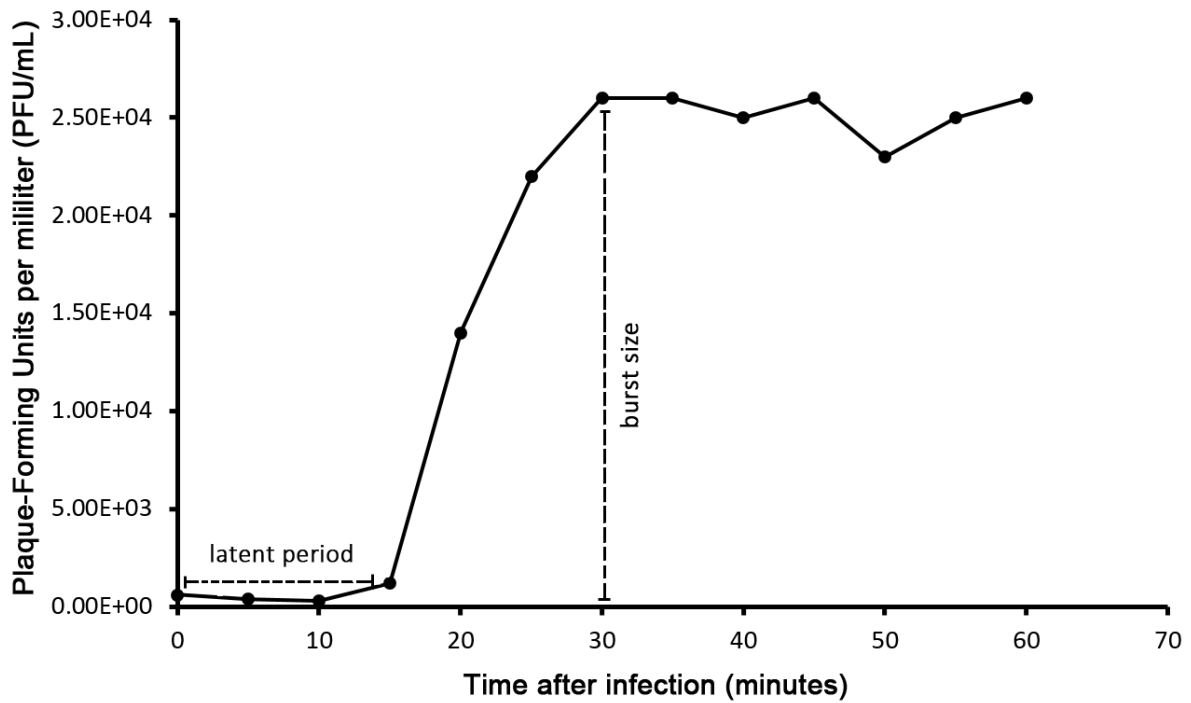

461

462



463

464 **FIGURE 6**

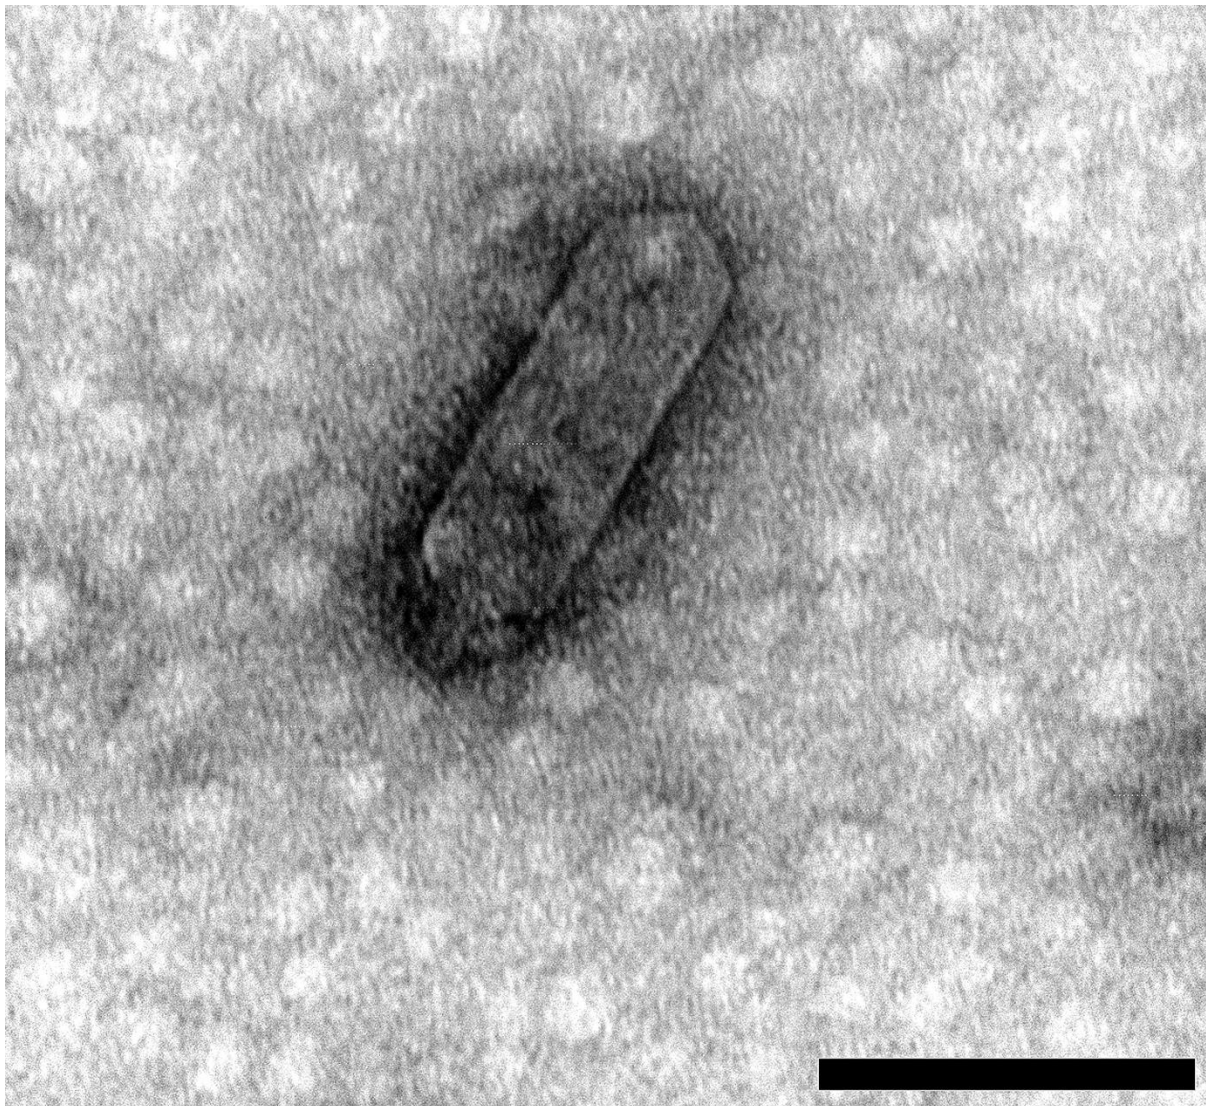

465

466
